# Supplementary material
Source: MDPI journal article supplement (https://www.mdpi.com/2305-7084/3/1/25)
Supplement: s1 [file s1]

Supplementary Materials

# CNT and H<sub>2</sub> Production during CH<sub>4</sub> Decomposition over Ni/CeZrO<sub>2</sub>. II. Catalyst Performance and its Regeneration in a Fluidized Bed

Agata Łamacz <sup>1,\*</sup> and Grzegorz Łabojko <sup>2</sup>

<sup>1</sup> Division of Chemistry and Technology of Fuels, Wrocław University of Technology, Gdanska 7/9, 50-344 Wrocław, Poland

<sup>2</sup> Institute for Chemical Processing of Coal, Zamkowa 1, 41-803 Zabrze, Poland. glabojko@ichpw.pl

\* Correspondence: agata.lamacz@pwr.edu.pl

Received: 18 January 2019; Accepted: 14 February 2019; Published: date

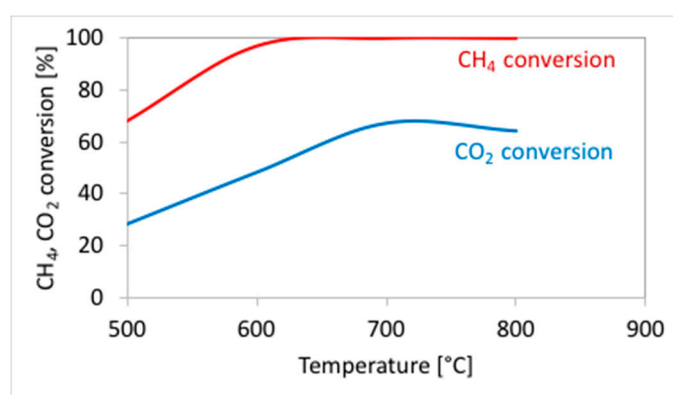

**Figure S1.** CH<sub>4</sub> and CO<sub>2</sub> conversion during dry reforming of methane over Ni/CeZrO<sub>2</sub>@CNT hybrid catalyst.

**Table S1.** Mass increase of Ni/CeZrO<sub>2</sub> (0.125–0.2 mm) after tests of CH<sub>4</sub> decomposition at various T, t and GHSV.

| Sample  | T (°C) | t (h) | GHSV (h <sup>-1</sup> ) | Δm (%) |
|---------|--------|-------|-------------------------|--------|
| A6/1_5  | 600    | 1     | 5 000                   | 7      |
| A6/3_5  | 600    | 3     | 5 000                   | 11     |
| A6/5_5  | 600    | 5     | 5 000                   | 17     |
| A6/1_10 | 600    | 1     | 10 000                  | 8      |
| A6/3_10 | 600    | 3     | 10 000                  | 10     |
| A6/5_10 | 600    | 5     | 10 000                  | 13     |
| A6/1_20 | 600    | 1     | 20 000                  | 4      |
| A6/3_20 | 600    | 3     | 20 000                  | 7      |
| A6/5_20 | 600    | 5     | 20 000                  | 9      |
| A7/1_5  | 700    | 1     | 5 000                   | 18     |
| A7/3_5  | 700    | 3     | 5 000                   | 43     |
| A7/5_5  | 700    | 5     | 5 000                   | 51     |
| A7/1_10 | 700    | 1     | 10 000                  | 13     |
| A7/3_10 | 700    | 3     | 10 000                  | 37     |
| A7/5_10 | 700    | 5     | 10 000                  | 41     |
| A7/1_20 | 700    | 1     | 20 000                  | 12     |
| A7/3_20 | 700    | 3     | 20 000                  | 29     |
| A7/5_20 | 700    | 5     | 20 000                  | 33     |

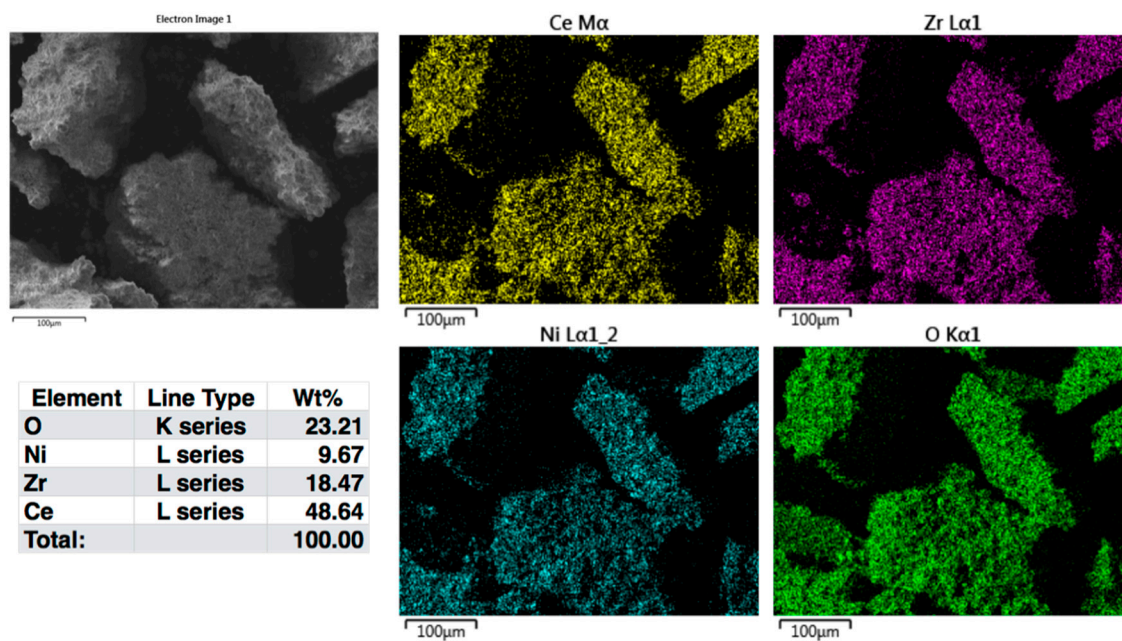

**Figure S2.** SEM picture, Ni, Ce, Zr and O mapping and composition of Ni/CeZrO<sub>2</sub> before CH<sub>4</sub> decomposition.

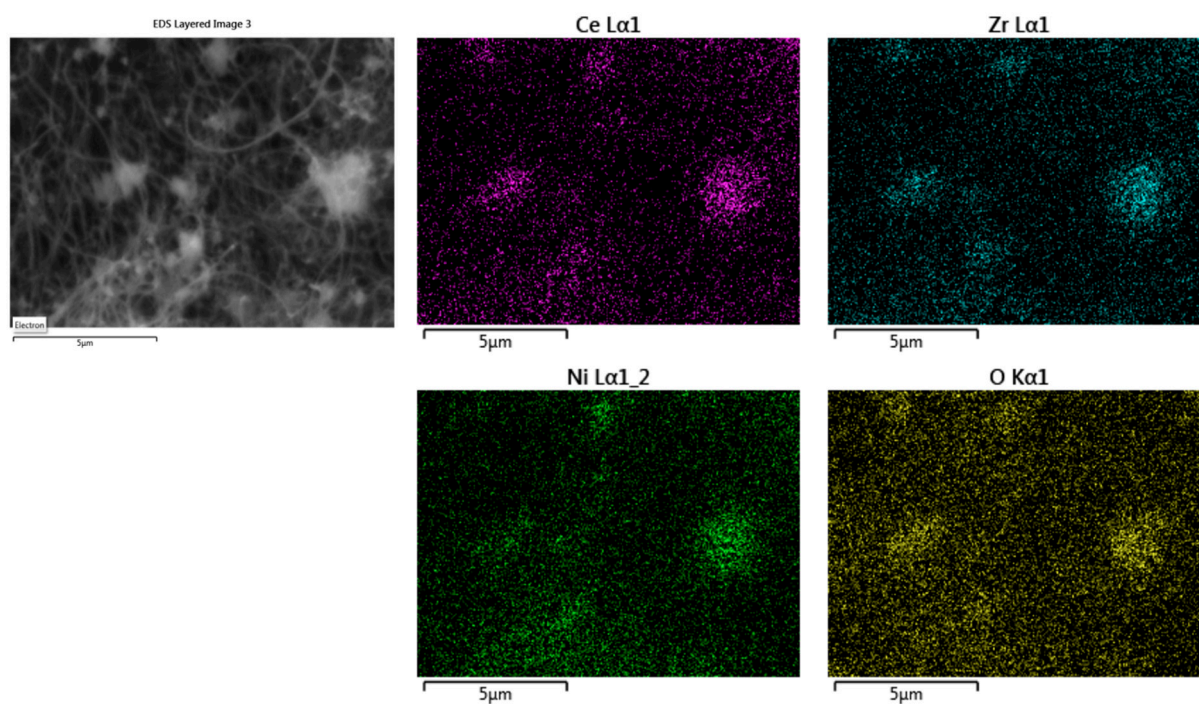

**Figure S3.** SEM picture, Ni, Ce, Zr and O mapping for Ni/CeZrO<sub>2</sub> after CH<sub>4</sub> decomposition (700 °C/5 h, GHSV = 10,000 h<sup>-1</sup>).

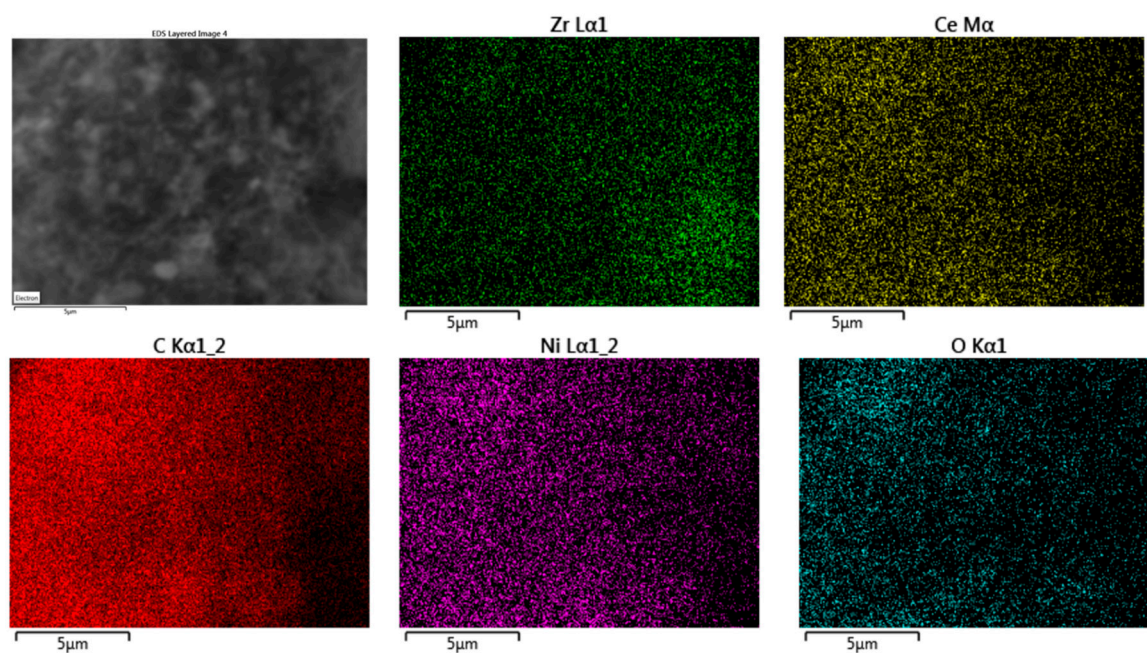

**Figure S4.** SEM picture, Ni, Ce, Zr and O mapping for Ni/CeZrO<sub>2</sub> after separation of carbon deposit.

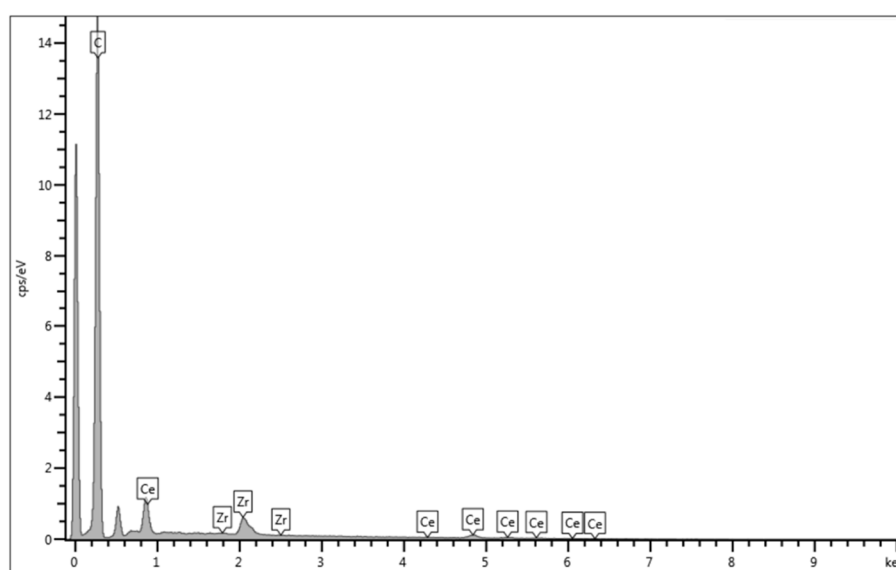

**Figure S5.** EDS spectra for carbon fraction after separation from Ni/CeZrO<sub>2</sub>.

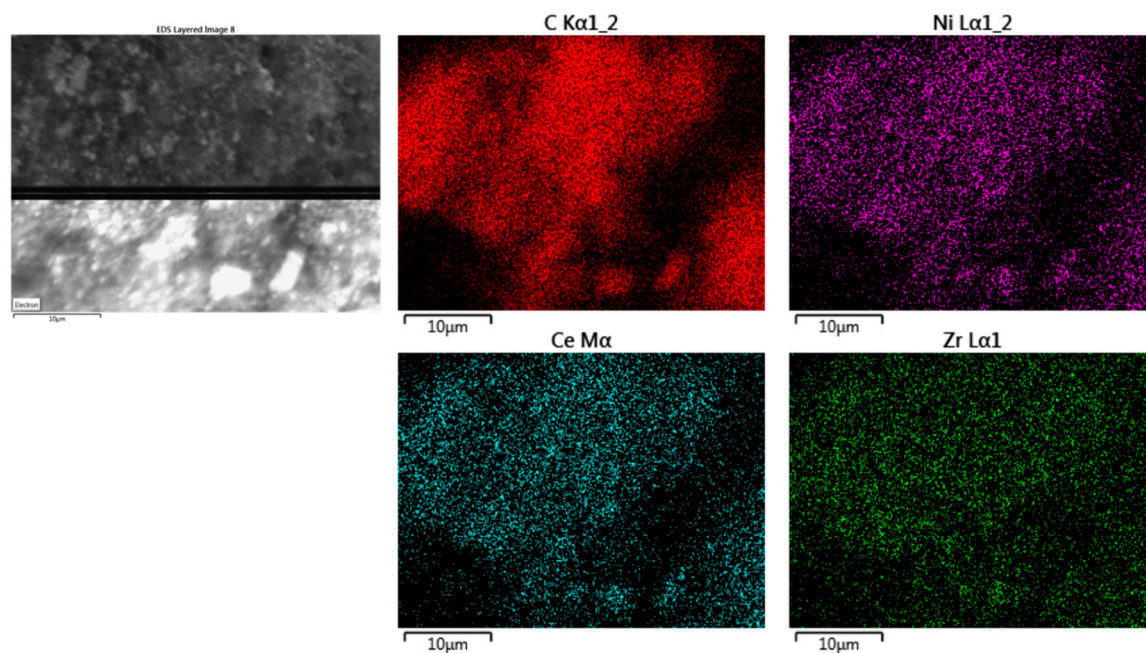

**Figure S6.** SEM picture and Ni, Ce, Zr and O mapping for carbon fraction after separation from Ni/CeZrO<sub>2</sub>.

**Table S2.** Mass increase of Ni-MgO after tests of CH<sub>4</sub> decomposition at various T, t and GHSV.

| Sample  | T (°C) | t (h) | GHSV (h <sup>-1</sup> ) | Δm (%) |
|---------|--------|-------|-------------------------|--------|
| B6/1_10 | 600    | 1     | 10,000                  | 26     |
| B6/3_10 | 600    | 3     | 10,000                  | 44     |
| B6/5_10 | 600    | 5     | 10,000                  | 51     |
| B6/1_20 | 600    | 1     | 20,000                  | 24     |
| B6/3_20 | 600    | 3     | 20,000                  | 40     |
| B6/5_20 | 600    | 5     | 20,000                  | 43     |
| B7/1_10 | 700    | 1     | 10,000                  | 63     |
| B7/3_10 | 700    | 3     | 10,000                  | 76     |
| B7/5_10 | 700    | 5     | 10,000                  | 80     |
| B7/1_20 | 700    | 1     | 20,000                  | 55     |
| B7/3_20 | 700    | 3     | 20,000                  | 60     |
| B7/5_20 | 700    | 5     | 20,000                  | 62     |



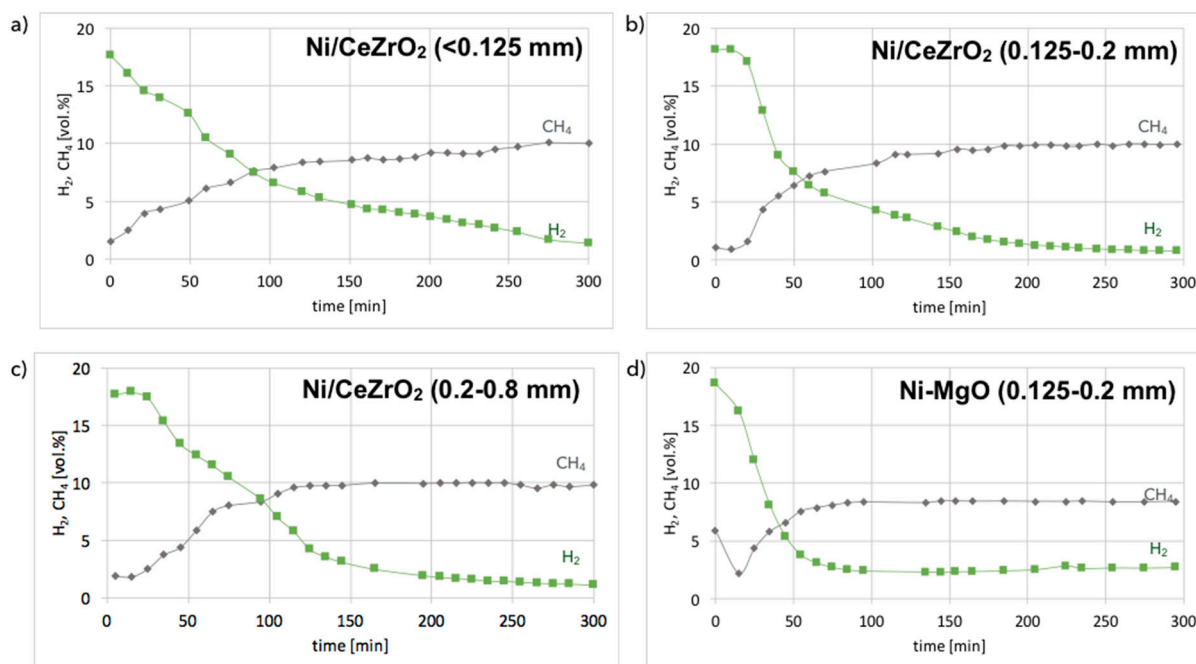

**Figure S7.** Composition of the outlet gas from fluidized bed reactor during CH<sub>4</sub> decomposition on Ni/CeZrO<sub>2</sub> and Ni/MgO catalysts (T = 700 °C; GHSV = 10,000 h<sup>-1</sup>).

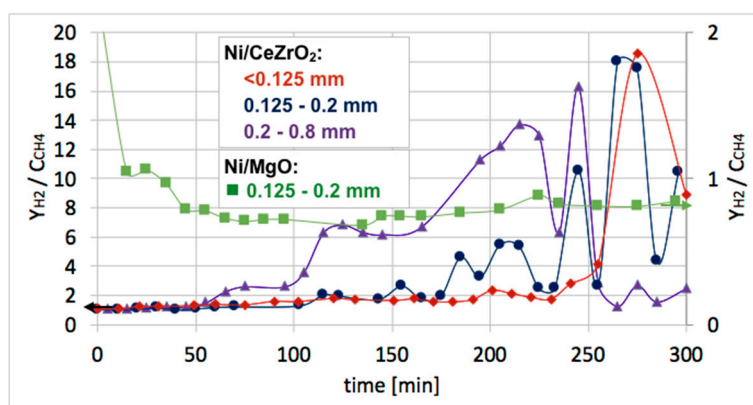

**Figure S8.** CH<sub>4</sub> conversion to H<sub>2</sub> yield (CCH<sub>4</sub>/YH<sub>2</sub>) ratio during CH<sub>4</sub> decomposition on Ni/CeZrO<sub>2</sub> and Ni/MgO catalysts (T = 700 °C; GHSV = 10,000 h<sup>-1</sup>).

**Table S3.** CH<sub>4</sub> consumption and H<sub>2</sub> production per 1 mol of Ni in Ni/CeZrO<sub>2</sub> and Ni-MgO during CH<sub>4</sub> decomposition tests.

| Ni/CeZrO <sub>2</sub> | CH <sub>4</sub> /Ni (mol/mol) | H <sub>2</sub> /Ni (mol/mol) |
|-----------------------|-------------------------------|------------------------------|
| 1st                   | 12.36                         | 24.44                        |
| 2nd                   | 10.56                         | 18.55                        |
| 3rd                   | 8.51                          | 12.11                        |
| 4th                   | 5.50                          | 9.60                         |
| NiMgO                 | 2.29                          | 3.88                         |

### Regeneration of Ni/CeZrO<sub>2</sub> in H<sub>2</sub>O in Temperature Programmed Conditions in Micro-Reactor.

Regeneration of Ni/CeZrO<sub>2</sub> was carried out in flowing 4.15 vol.% H<sub>2</sub>O/Ar under GHSV of 5000 h<sup>-1</sup>. The samples used for regeneration were obtained after CH<sub>4</sub> decomposition at 700 °C carried out for 1, 3 and 5 h in GHSV of 5000 and 20,000 h<sup>-1</sup>. Yields of H<sub>2</sub>, CO and CO<sub>2</sub> as a function of temperature during regeneration tests are presented in Figure S9. Conversion of H<sub>2</sub>O is shown in Figure S10.

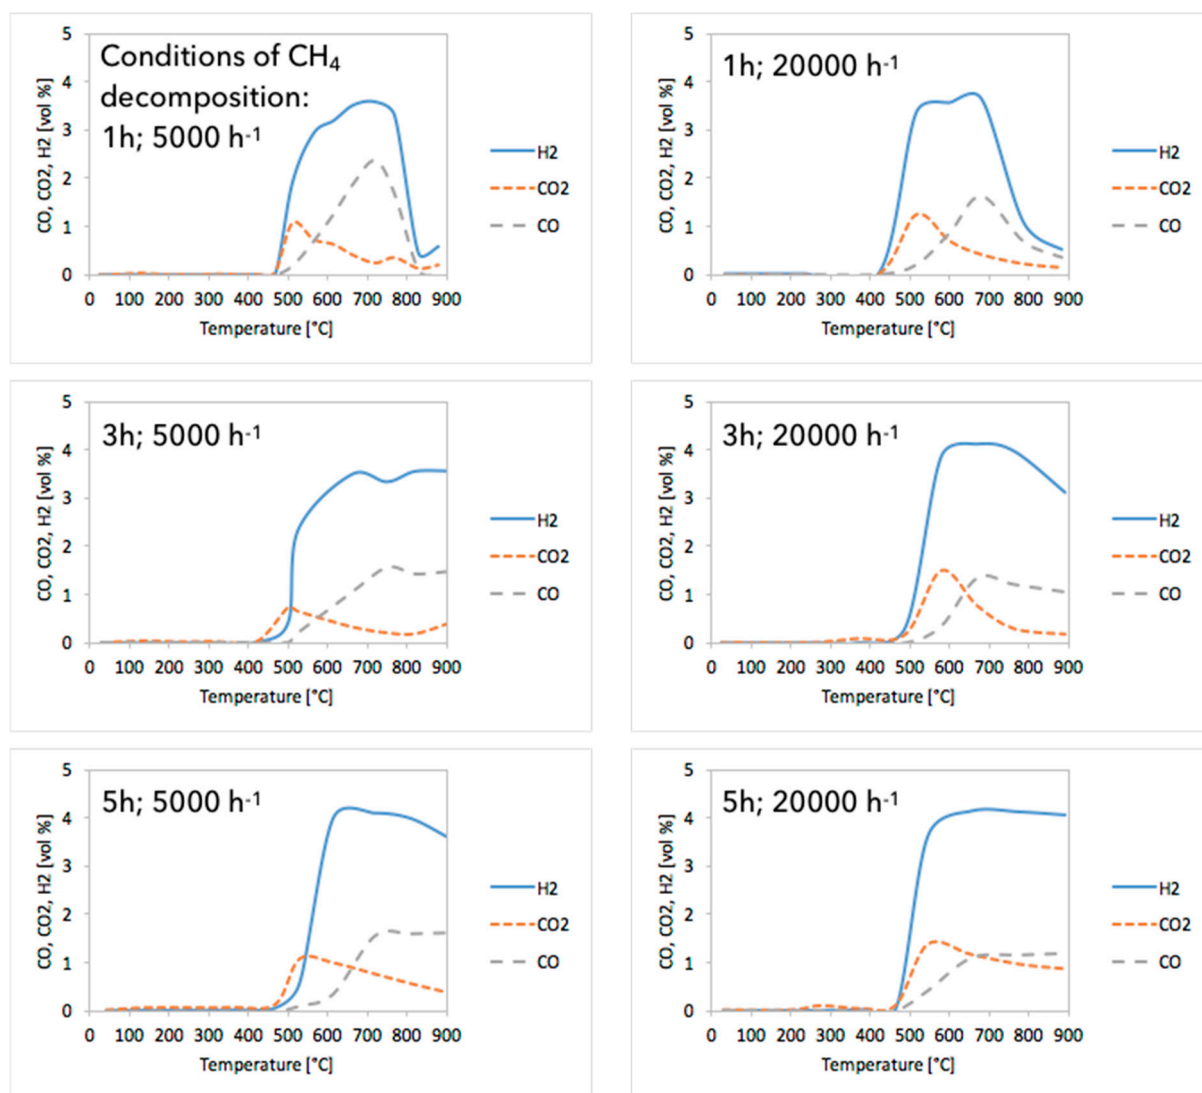

**Figure S9.** H<sub>2</sub>, CO and CO<sub>2</sub> formation during regeneration of Ni/CeZrO<sub>2</sub> in 4.15 vol.% H<sub>2</sub>O/Ar after 1, 3 and 5 hours of CH<sub>4</sub> deposition at 700 °C and GHSV of 5000 and 20,000 h<sup>-1</sup>.

In each case small amounts of H<sub>2</sub> are observed from ca. 400 °C, while at 500–550 °C H<sub>2</sub>O conversion usually exceeds 90%. The H<sub>2</sub>O dissociates on catalyst active sites (\*) being oxygen vacancies in CeZrO<sub>2</sub> or Ni<sup>0</sup> (Equation (S1)). Hydrogen desorbs from catalyst surface whereas oxygen (O\*) that is still adsorbed on the active site can oxidize nearby carbon deposit to CO<sub>2</sub> (at lower temperatures) and to CO (at higher temperatures) (Equations (S2)–(S4)). Amorphous carbon deposits are oxidized at lower temperatures and structural carbon (CNTs) are oxidized at higher temperatures. According to TGA of catalyst samples after separation of deposit, the amorphous carbon prevailed.

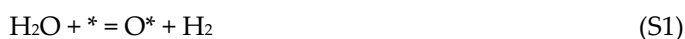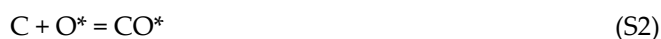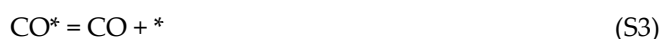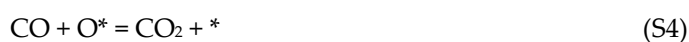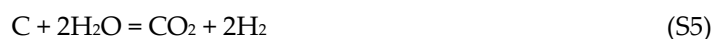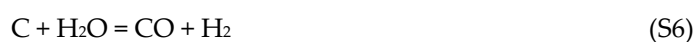

Rapid decrease in H<sub>2</sub> formation in the case of samples obtained after CH<sub>4</sub> decomposition for 1 hour is due to lower amount of carbon deposits on their surface. The rate of carbon deposits oxidation

is determined by temperature, whereas the duration of regeneration is determined by the amount of deposits on catalyst surface.

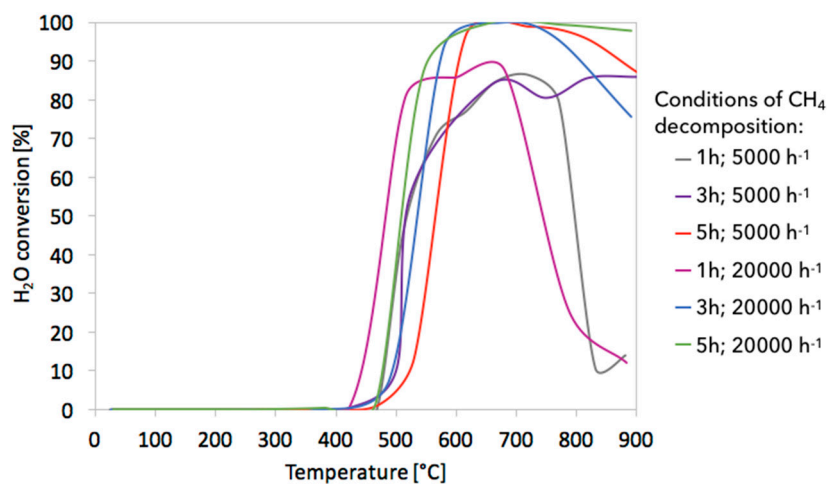

**Figure S10.** H<sub>2</sub>O to H<sub>2</sub> conversion during regeneration of Ni/CeZrO<sub>2</sub> after 1, 3 and 5 hours of CH<sub>4</sub> deposition at 700 °C and GHSV of 5000 and 20,000 h<sup>-1</sup>.

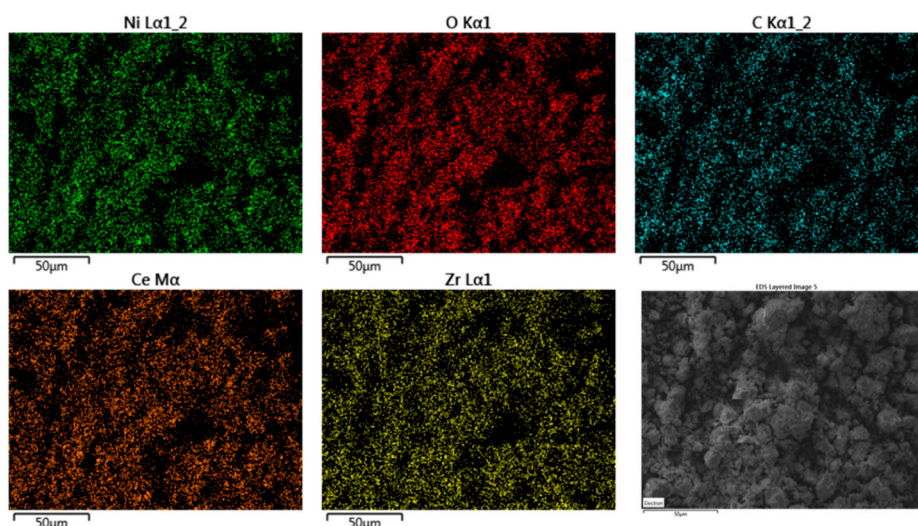

**Figure S11.** Ni, O, Ce, Zr and C mapping for Ni/CeZrO<sub>2</sub> after its 34-hour regeneration in 4.15 vol.% H<sub>2</sub>O/Ar.

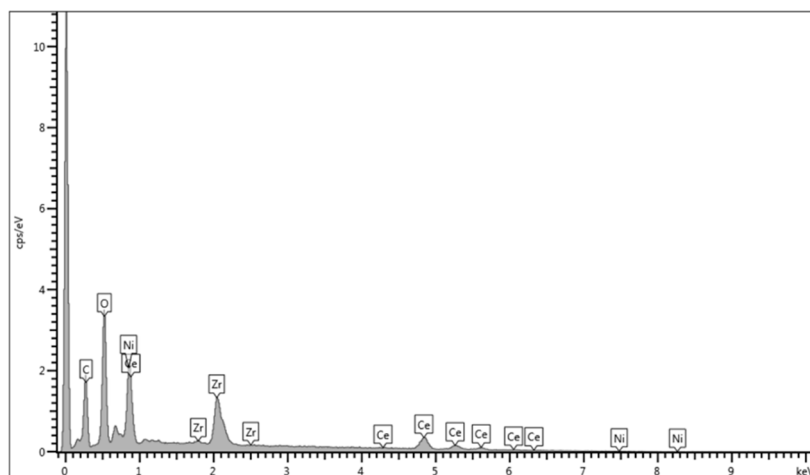

**Figure S12.** EDS for Ni/CeZrO<sub>2</sub> after 34-hour regeneration in 4.15 vol.% H<sub>2</sub>O/Ar.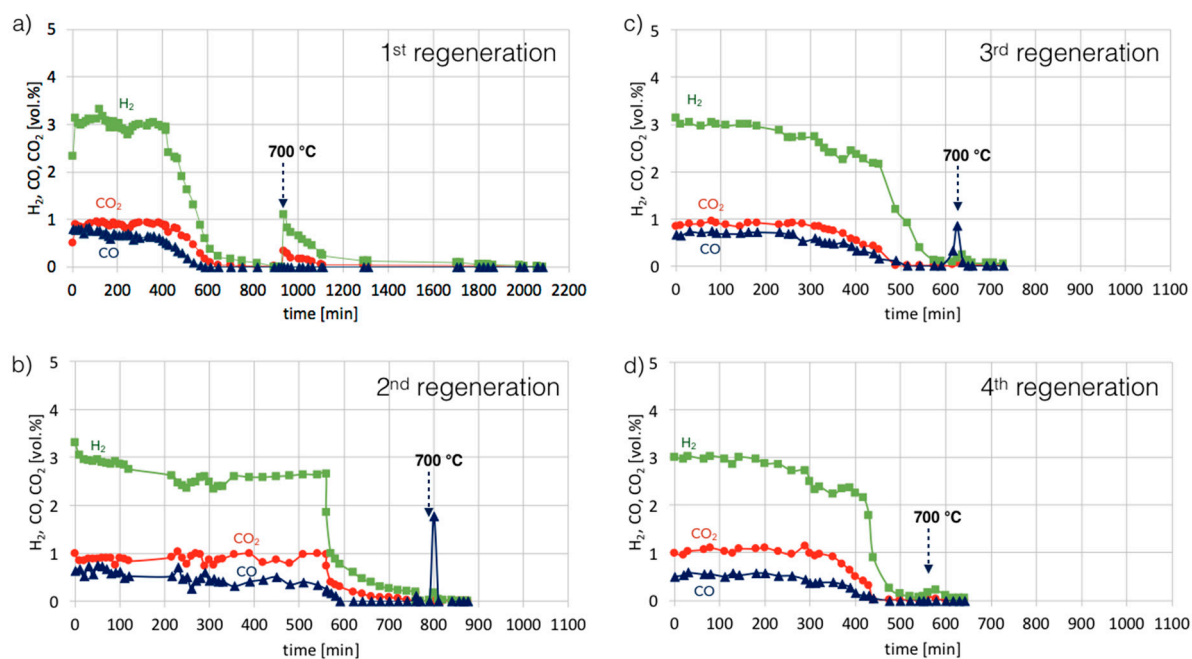**Figure S13.** Composition of the gas on reactor outlet during subsequent regeneration tests of Ni/CeZrO<sub>2</sub> (4.15 vol.% H<sub>2</sub>O/Ar, T = 550 and 700 °C, GHSV = 2000 h<sup>-1</sup>).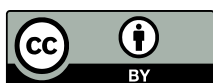

© 2019 by the authors. Submitted for possible open access publication under the terms and conditions of the Creative Commons Attribution (CC BY) license (<http://creativecommons.org/licenses/by/4.0/>).
